# Supplementary material
Source: PubMed Central journal article supplement (PMC7407745)
Supplement: ajtr0012-3858-f6.pdf [file ajtr0012-3858-f6.pdf]

## NSUN5 promotes CRC progression via cell cycle regulation

**Table S1.** List of primary antibodies used in the study

| Antibody        | Applications | Company (CAT#)         |
|-----------------|--------------|------------------------|
| NSUN5           | IHC, WB      | Ab121633               |
| CDK4            | WB           | Proteintech 11026-1-AP |
| CDK6            | WB           | Proteintech 14052-1-AP |
| P21             | WB           | CST#2974               |
| Rb              | WB           | CST#9309               |
| pRb             | WB           | CST#8516               |
| CCNE1           | WB           | Ab85639                |
| Caspase3        | WB           | Ab13847                |
| C-caspase3      | WB           | Ab2303                 |
| Bcl-2           | WB           | Ab32124                |
| GAPDH           | WB           | Proteintech 60004-1-Ig |
| $\beta$ -Tublin | WB           | Proteintech10094-1-AP  |
| 7-AAD           | FCM          | Biolegend 640930       |
| APC Annexin V   | FCM          | Biolegend 640930       |
| PI              | FCM          | Biolegend 421301       |

NSUN5 promotes CRC progression via cell cycle regulation

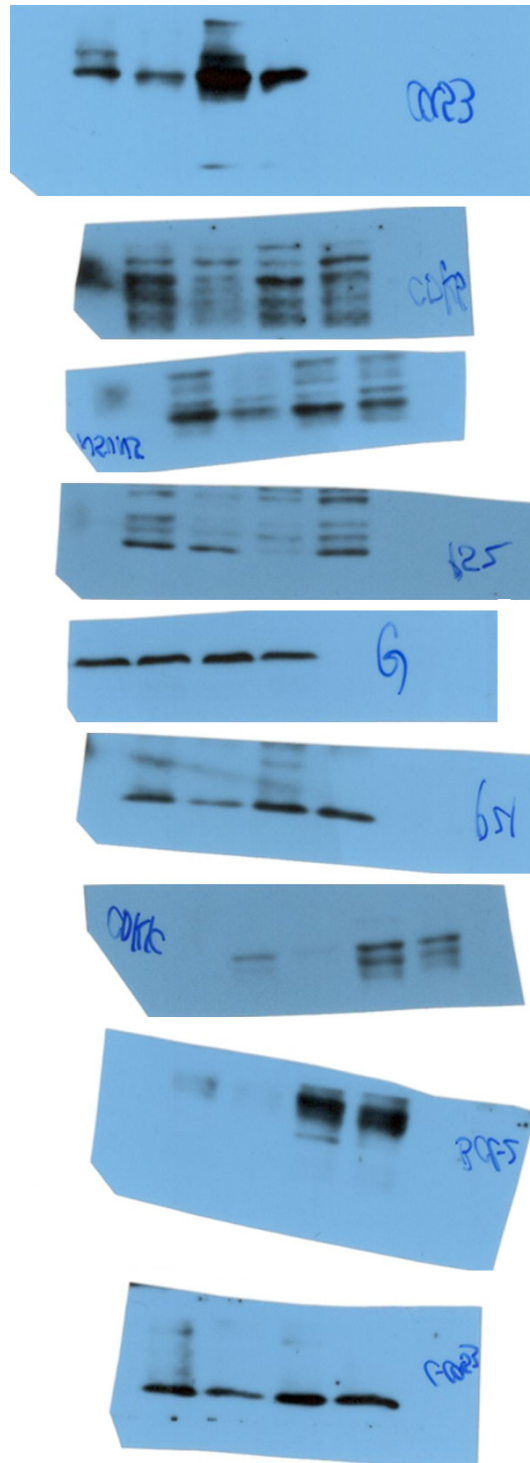

**Figure S1.** The original western images of GAPDH, CDK4, CDK6, NSUN5, Bcl-2, Caspase-3, Cleaved-caspase-3.

# NSUN5 promotes CRC progression via cell cycle regulation

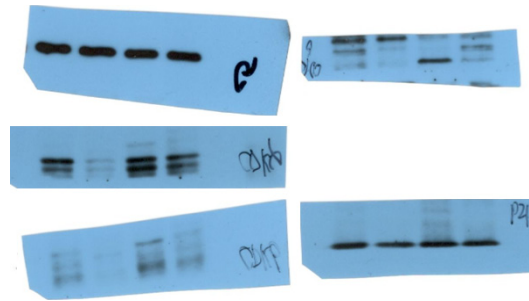

**Figure S2.** The original western images of GAPDH, CDK4, CDK6, P21.

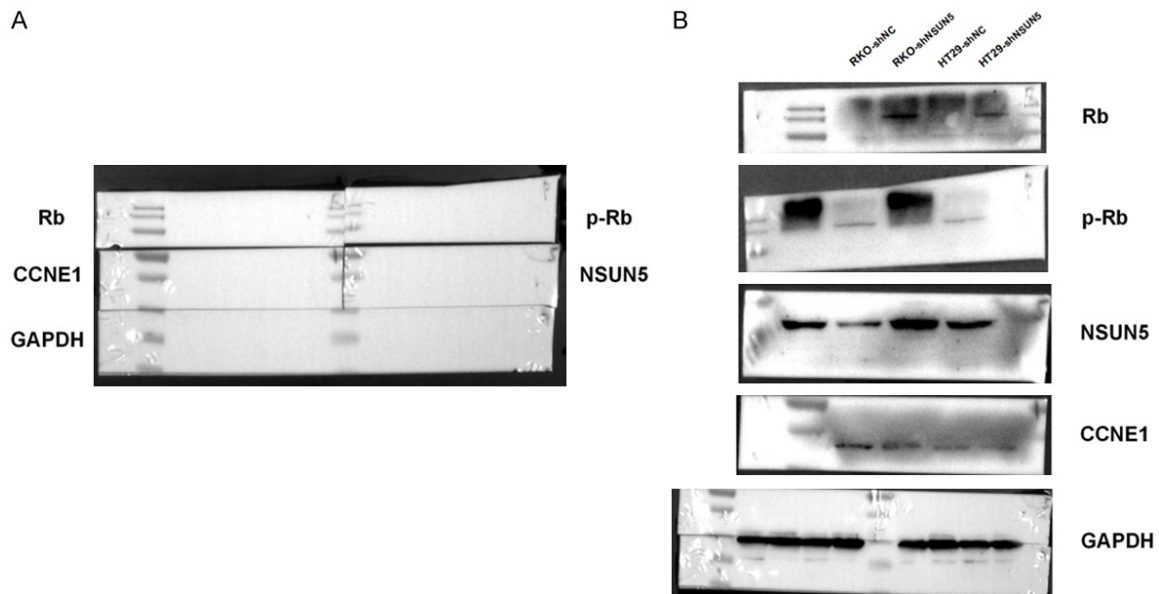

**Figure S3.** A. The original image of the integral membrane. B. The original western images of GAPDH, Rb, p-Rb, NSUN5, CCNE1.

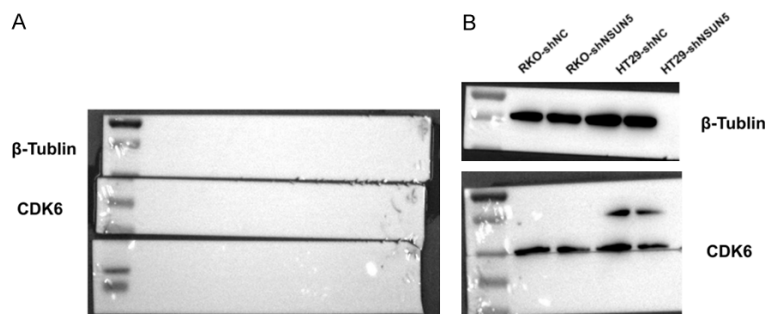

**Figure S4.** A. The original image of the integral membrane. B. The original western images of beta-Tubulin and CDK6.
